# Supplementary material for: CoFeS2@CoS2 Nanocubes Entangled with CNT for Efficient Bifunctional Performance for Oxygen Evolution and Oxygen Reduction Reactions
Source: MDPI journal article supplement (doi:10.3390/nano12060983), 2022-03-16
Supplement: s1 [file s1]

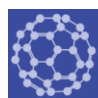

## Supplementary Material

# CoFeS<sub>2</sub>@CoS<sub>2</sub> Nanocubes Entangled with CNT for Efficient Bifunctional Performance for Oxygen Evolution and Oxygen Reduction Reactions

Jaeun Jeon <sup>1,†</sup>, Kyoung Ryeol Park <sup>2,†</sup>, Kang Min Kim <sup>3,†</sup>, Daehyeon Ko <sup>4</sup>, HyukSu Han <sup>5</sup>, Nuri Oh <sup>6</sup>, Sunghwan Yeo <sup>7,\*</sup>, Chisung Ahn <sup>1,\*</sup> and Sungwook Mhin <sup>4,\*</sup>

<sup>1</sup> Korea Institute of Industrial Technology, 113-58, Seohaean-ro, Siheung 15014, Republic of Korea; jaeun00@kitech.re.kr

<sup>2</sup> Korea Institute of Industrial Technology, 55 Jongga-ro, Jung-gu, Ulsan 44413, Republic of Korea; krpark@kitech.re.kr

<sup>3</sup> Korea Institute of Industrial Technology, 137-41 Gwahakdanji-ro, Gangneung 25440, Republic of Korea; kmkim@kitech.re.kr

<sup>4</sup> Department of Advanced Materials Engineering, Kyonggi University, Suwon 16227, Republic of Korea; godh3134@naver.com

<sup>5</sup> Department of Energy Engineering, Konkuk University, Seoul 05029, Republic of Korea; hhan@konkuk.ac.kr

<sup>6</sup> Department of Advanced Materials Engineering, Hanyang University, Seoul 04763, Republic of Korea; irunho@hanyang.ac.kr

<sup>7</sup> Korea Atomic Energy Research Institute, Daedeok-Daero 989-111, Yuseong-gu, Deajeon 305353, Republic of Korea

\* Correspondence: syeo@kaeri.re.kr (S.Y.); cahn@kitech.re.kr (C.A.); swmhin@kgu.ac.kr (S.M.)

† These authors contributed equally to this work.

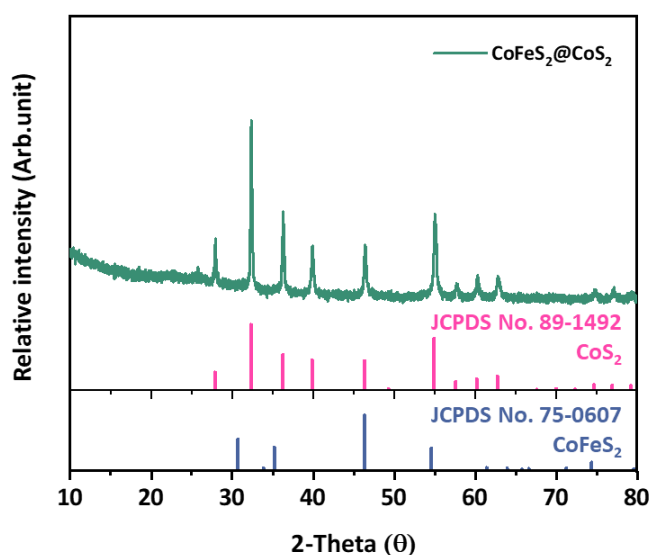

Figure S1. XRD data of pure CoFeS<sub>2</sub>@CoS<sub>2</sub>.

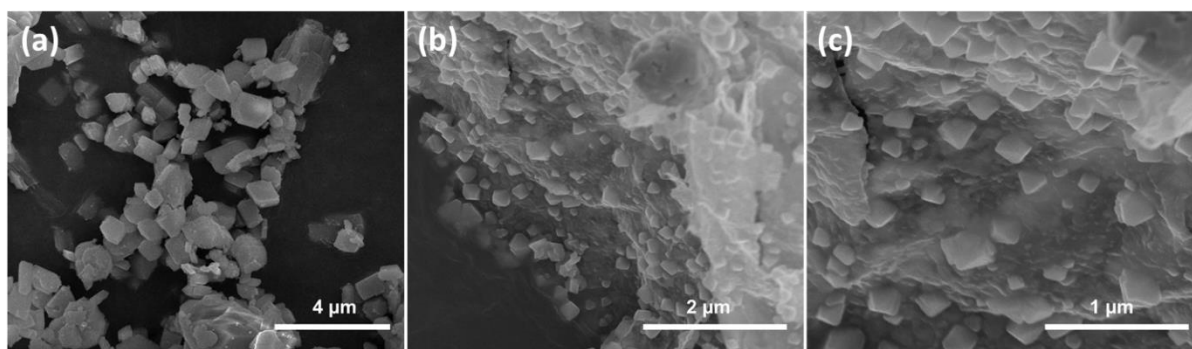

Figure S2. (a–c) Microstructure of pure  $\text{CoFeS}_2@\text{CoS}_2$ .

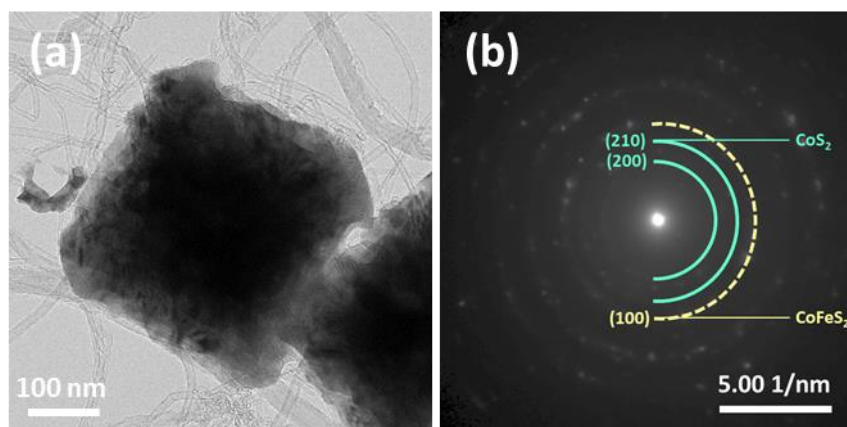

Figure S3. (a) TEM image of  $\text{CoFeS}_2@\text{CoS}_2/\text{CNTs}$  with (b) SAED pattern.

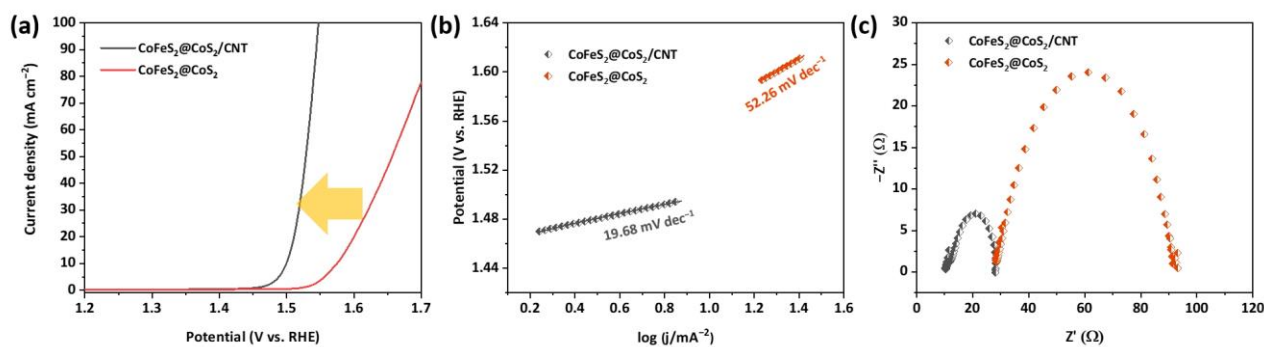

Figure S4. OER properties of the  $\text{CoFeS}_2@\text{CoS}_2$  with/without CNTs (a) LSV curve, (b) Tafel plot, (c) Nyquist plot.

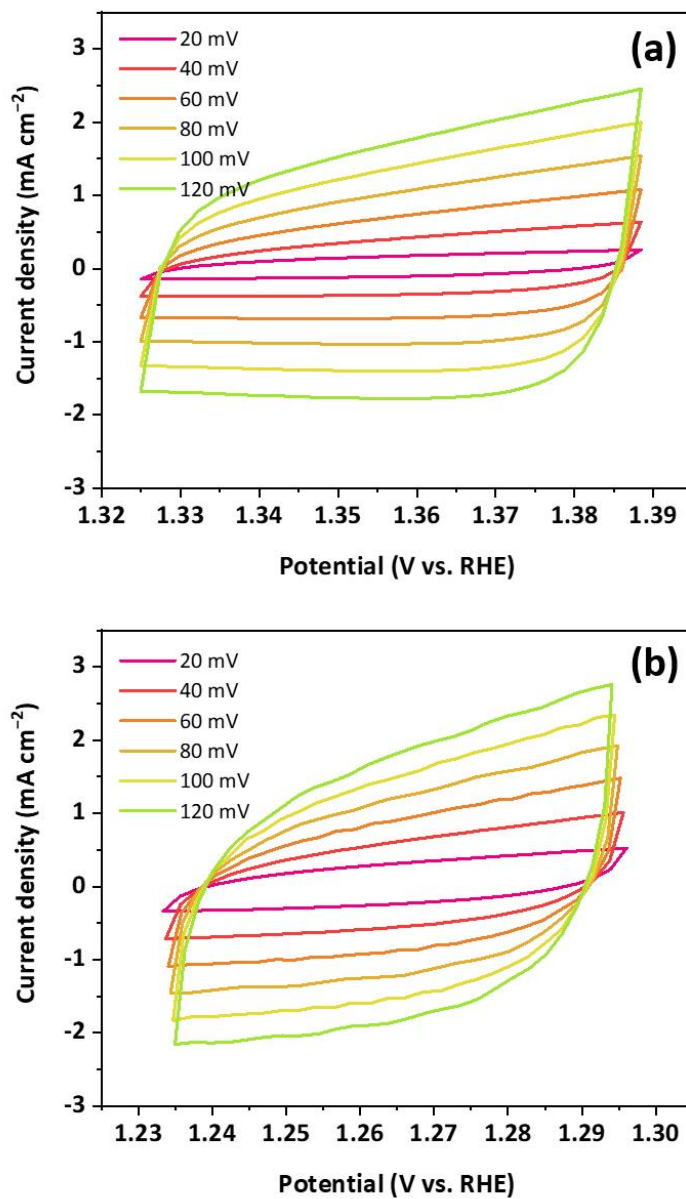

**Figure S5.** CV measurements in a capacitive current region at scan rates 20, 40, 60, 80, 100, and 120 s<sup>-1</sup> of (a) CoS<sub>2</sub>/CNTs and (b) CoFeS<sub>2</sub>@CoS<sub>2</sub>/CNTs.

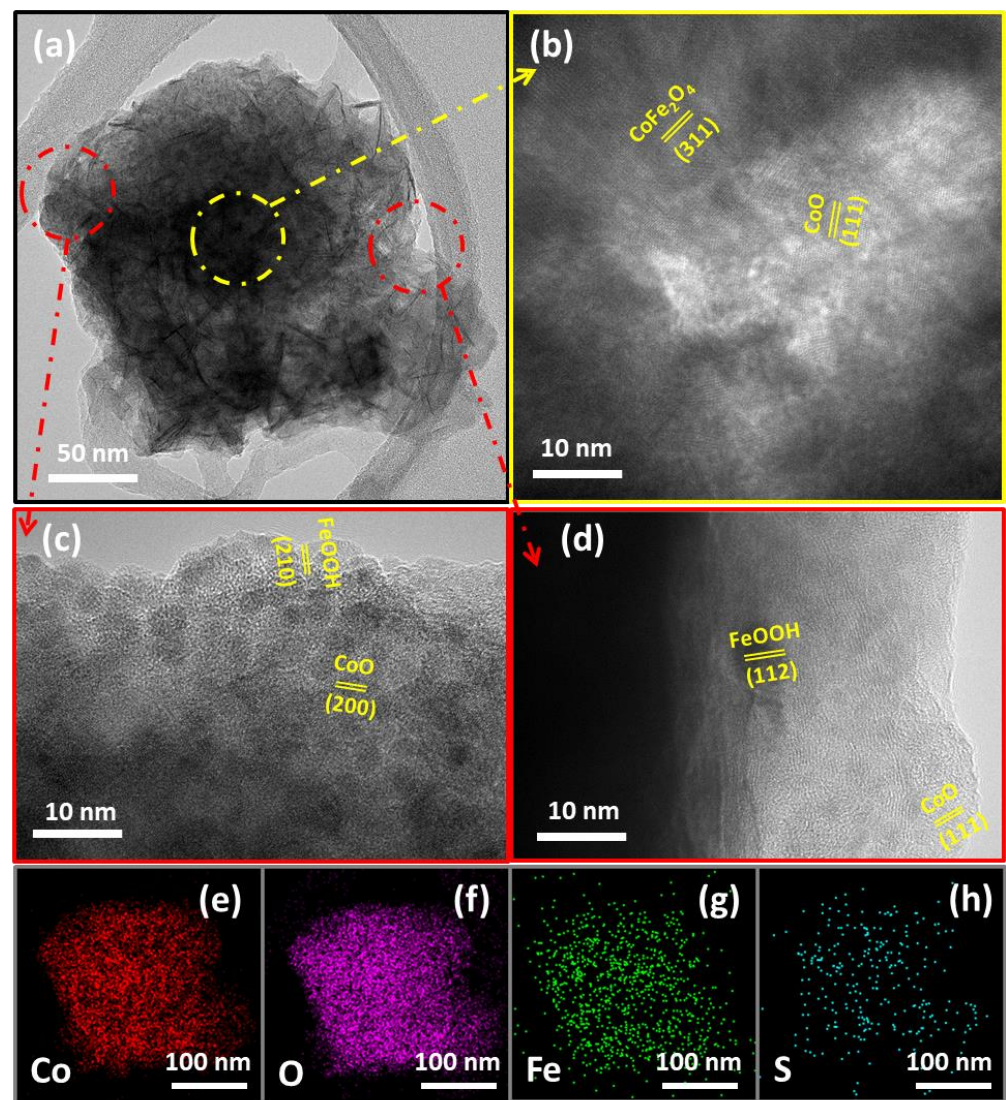

**Figure S6.** Morphology and structure characterizations of CoFeS<sub>2</sub>@CoS<sub>2</sub>/CNTs after stability test for 12 h. (a–d) TEM image and HRTEM images and (e–h) element maps.



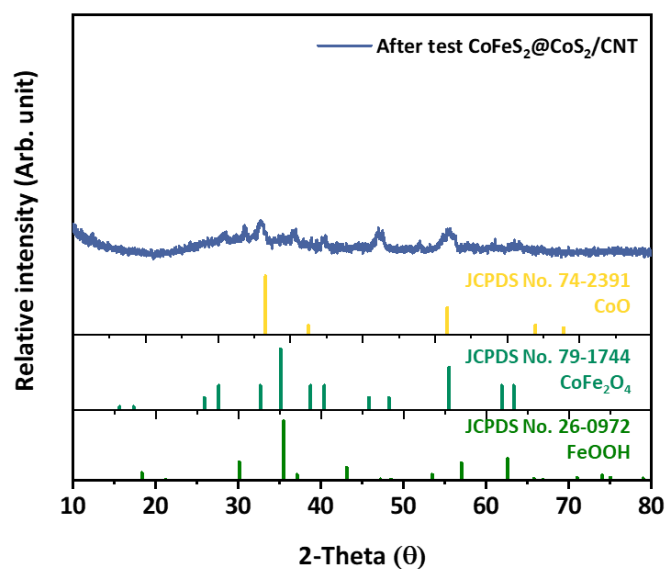

**Figure S7.** X-ray diffraction patterns of the CoFeS<sub>2</sub>@CoS<sub>2</sub>/CNTs after 12 h of OER.

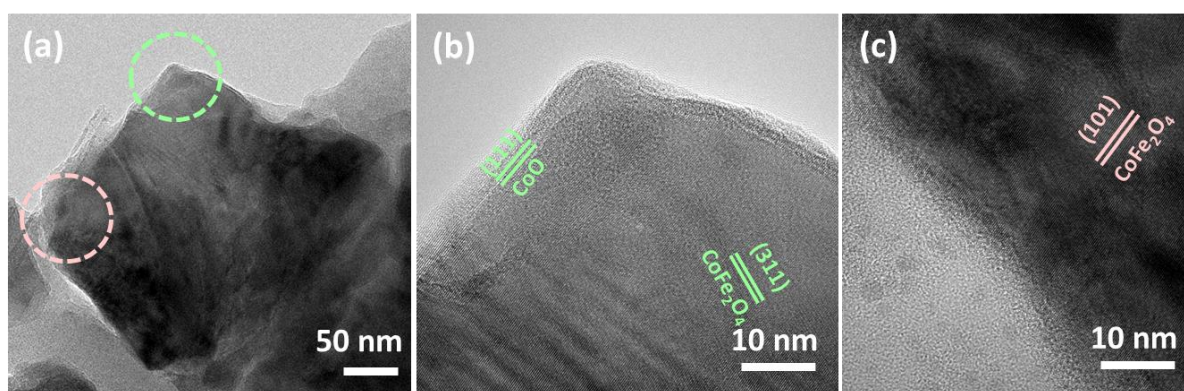

**Figure S8.** (a) TEM and (b–c) HRTEM images of the CoFeS<sub>2</sub>@CoS<sub>2</sub>/CNTs after 2000 cycles of ORR.

**Table S1.** Comparison of OER/ORR catalytic activity of CoFeS<sub>2</sub>@CoS<sub>2</sub>/CNTs with the recently reported Co, Fe-based catalysts.

| Electrocatalyst           | Electrolyte                          | Overpotential (@10 mA cm <sup>-2</sup> ) | ORR Onset potential | Tafel slope (mV dec <sup>-1</sup> ) | Stability   | Reference |
|---------------------------|--------------------------------------|------------------------------------------|---------------------|-------------------------------------|-------------|-----------|
| This work                 | 1.0 M KOH                            | 269                                      | 0.976               | 19.68                               | 12 h        |           |
| CoS <sub>2</sub> microbox | 1.0 M KOH                            | 308                                      | -                   | 41.40                               | 1000 cycled | S1        |
|                           | 0.5 M H <sub>2</sub> SO <sub>4</sub> | 278                                      | -                   | 73.00                               | 1000 cycled | S2        |

| Co-FeS <sub>2</sub> /CoS <sub>2</sub> |           |     |      |       |      |    |  |
|---------------------------------------|-----------|-----|------|-------|------|----|--|
| Fe <sub>7</sub> S <sub>8</sub> bulk   | 1.0 M KOH | 380 | -    | 96.00 | -    | S3 |  |
| NiCo-Phi/CNT                          | 0.1 M KOH | 400 | 0.75 | 117   | 20 h | S4 |  |

## References

1. Hua, Y.; Jiang, H.; Jiang, H.; Zhang, H.; Li, C. Hierarchical porous CoS<sub>2</sub> microboxes for efficient oxygen evolution reaction. *Electrochim. Acta*. **2018**, *278*, 219–225.
2. Wang, K.; Guo, W.; Yan, S.; Song, H.; Shi, Y. Hierarchical CoFeS<sub>2</sub>/CoS<sub>2</sub> heterostructures as a superior bifunctional electrocatalyst. *RSC adv.* **2018**, *8*(50), 28684–28691.
3. Ni
4. Sathiskumar, C.; Alex, C.; John, N. S. Nickel cobalt phosphite nanorods decorated with carbon nanotubes as bifunctional electrocatalysts in alkaline medium with a high yield of hydrogen peroxide. *ChemElectroChem*. **2020**, *7*(8), 1935–1942.
